# Supplementary material for: Influence of Hemorrhagic Complications of Pancreatoduodenectomy in Patients with Cancer on Short- and Long-Term Mortality
Source: MDPI journal article supplement (doi:10.3390/jcm12082852), 2023-04-13
Supplement: s1 [file s1]

| Variables                                                             | Grade B (n=48) | Grade C (n=50) | p value*             |
|-----------------------------------------------------------------------|----------------|----------------|----------------------|
| Time of onset in days (mean) (standard deviation)                     | 8,9 +/- 14,8   | 13,2 +/- 9,5   | 0,1 <sup>?</sup>     |
| Exteriorisation                                                       | 38 (82,0%)     | 37 (75,8%)     | 0,6                  |
| Sentinel bleeding                                                     | 9 (18,8%)      | 14 (28,0%)     | 0,3                  |
| Time of onset of sentinel bleeding in days (mean, standard deviation) | 7,4 +/- 12,5   | 11,1 +/- 12,9  | 0,5 <sup>?</sup>     |
| Average time to onset of bleeding (mean, standard deviation)          | 2,7 +/- 5,4    | 2,7 +/- 7,9    | 1 <sup>?</sup>       |
| Blood loss                                                            |                |                |                      |
| Mean hemoglobin loss compared to D1*                                  | 3,5 +/- 2,2    | 4,5 +/- 2,3    | 0,06 <sup>?</sup>    |
| Clinical shock                                                        | 16 (33,3%)     | 44 (88,0%)     | <0,0001              |
| Transfusion                                                           | 37 (77,1%)     | 46 (92,0%)     | 0,04                 |
| Mean of red blood cell unit (mean, standard deviation)                | 2,9 +/- 2,1    | 7,4 +/- 5,5    | <0,0001 <sup>?</sup> |
| CT-scan                                                               | 30 (62,5%)     | 31 (62,0%)     | 1                    |
| Arteriography                                                         | 15 (31,3%)     | 20 (40,0%)     | 0,4                  |
| Embolisation                                                          | 12 (80,0%)     | 20 (100,0%)    | 0,1                  |
| Stenting                                                              | 6 (40,0%)      | 8 (40,0%)      | 0,6                  |
| Successful                                                            | 13 (86,7%)     | 13 (65,0%)     | 0,9                  |
| Reintervention                                                        | 21 (41,8%)     | 36 (72,0%)     | 0,005                |
| Successful                                                            | 18 (85,7%)     | 31 (86,1%)     | 1                    |
| Endoscopy                                                             | 14 (29,2%)     | 12 (24,0%)     | 1                    |
| Recurrence                                                            | 13 (27,1%)     | 17 (34,0%)     | 0,5                  |
| Location of bleeding*                                                 |                |                |                      |
| Gastroduodenal artery                                                 | 7 (14.6%)      | 15 (30.0%)     |                      |
| Superior mesenteric artery                                            | 3 (6.3%)       | 7 (14.0%)      |                      |
| Hepatic artery                                                        | 6 (12.5%)      | 13 (26.0%)     |                      |
| Splenic artery                                                        | 5 (10.4%)      | 5 (10.0%)      |                      |
| Pancreaticoduodenal arcade artery                                     | 4 (8.3%)       | 3 (6.0%)       |                      |
| Pancreatic stump                                                      | 11 (22.9%)     | 14 (28.0%)     |                      |
| Celiac trunk                                                          | 0 (0.0%)       | 1 (2.0%)       |                      |
| Gastrojejunostomy                                                     | 8 (16.7%)      | 6 (12.0%)      |                      |
| Veinous                                                               | 5 (10.4%)      | 9 (18.0%)      |                      |
| Others (liver, spleen, omentum)                                       | 6 (12.5%)      | 8 (16.0%)      |                      |
| Location not found                                                    | 15 (31.3%)     | 3 (6.0%)       |                      |

**Supplemental data S1. Clinical presentation and therapeutic management of PPH grade B(n=48) and C (n=50) (\*chi2-test, <sup>?</sup> Student t-test) (\*Some patients may have had multiple bleeding sites).**
